# Supplementary material for: First polar quaternary sulphide CsLiGa6S10with mixed ordered alkali cations displaying excellent infrared nonlinear optical properties
Source: Royal Society of Chemistry journal article supplement (doi:10.1039/d2qi01569b), 2022-01-01
Supplement: d2qi01569b1.pdf [file d2qi01569b1.pdf]

## Supporting Information

### **First Polar Quaternary Sulphide CsLiGa<sub>6</sub>S<sub>10</sub> with Mixed Ordered Alkali Cations Displaying Excellent Infrared Nonlinear Optical Properties**

Zi Wang,<sup>a,b</sup> Bin-Wen Liu,<sup>a,c,\*</sup> and Guo-Cong Guo<sup>a,c,\*</sup>

<sup>a</sup> State Key Laboratory of Structural Chemistry, Fujian Institute of Research on the Structure of Matter, Chinese Academy of Sciences, Fuzhou, Fujian, 350002, P. R. China

<sup>c</sup> University of Chinese Academy of Sciences, Beijing 100039, PR China

<sup>b</sup> Fujian Science & Technology Innovation Laboratory for Optoelectronic Information of China, Fuzhou, Fujian 350108, P. R. China

\* E-mail addresses: bwliu@fjirsm.ac.cn (B.-W. Liu), gcguo@fjirsm.ac.cn (G.-C. Guo)

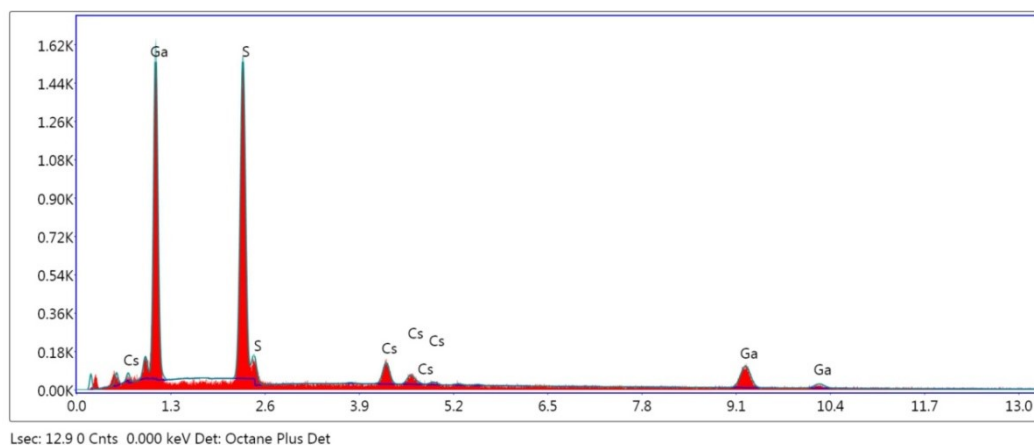

**Fig. S1** The EDS result of CsLiGa<sub>6</sub>S<sub>10</sub>.

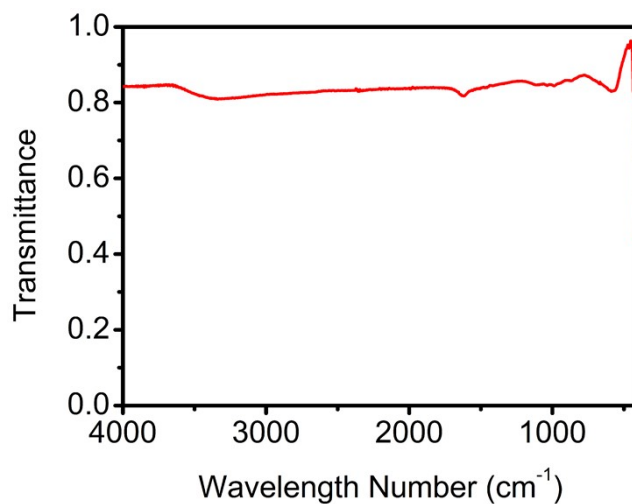

**Fig. S2** IR spectrum of CsLiGa<sub>6</sub>S<sub>10</sub>.

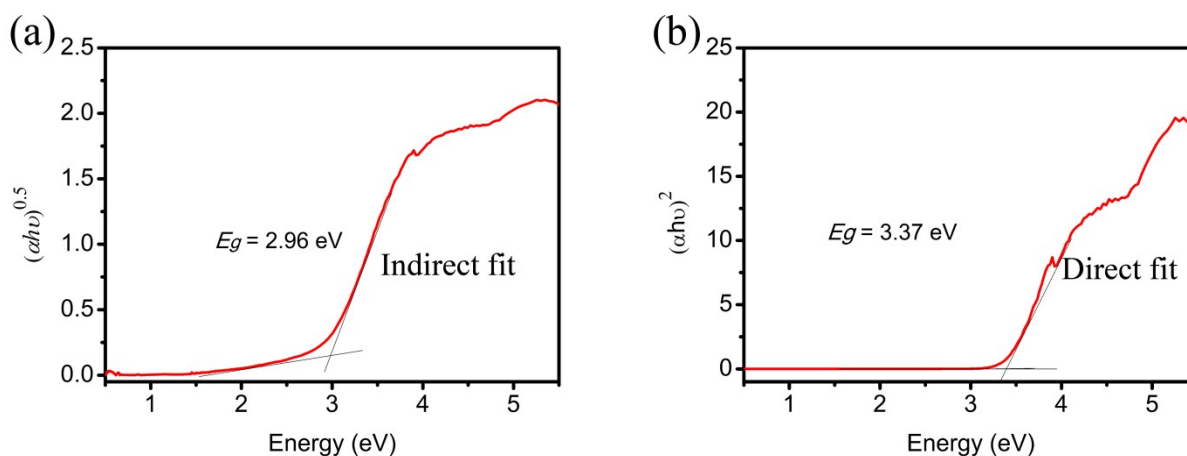

**Fig. S3** The indirect and direct models to determine the band gap of CsLiGa<sub>6</sub>S<sub>10</sub>.

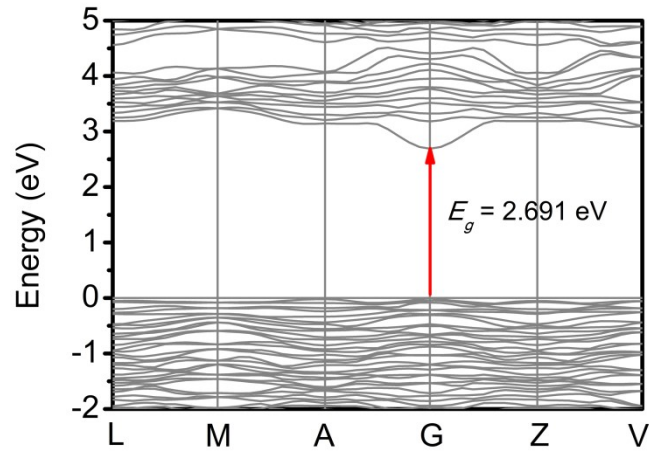

**Fig. S4** Band structure of CsLiGa<sub>6</sub>S<sub>10</sub>.

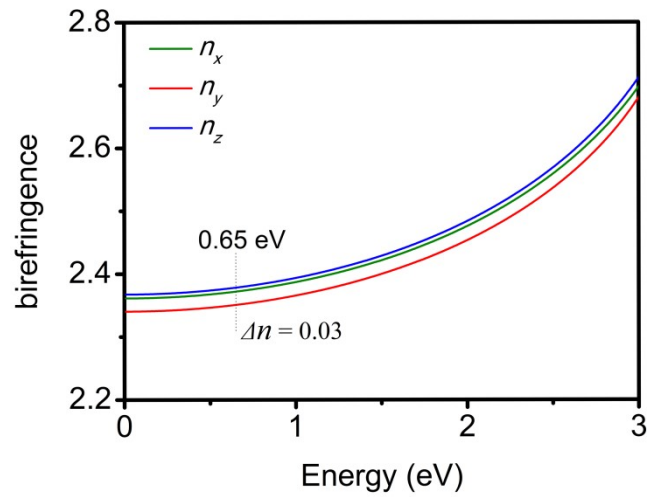

**Fig. S5** The energy dependence birefringence of CsLiGa<sub>6</sub>S<sub>10</sub>.

**Table S1** Crystal data and structure refinements for CsLiGa<sub>6</sub>S<sub>10</sub>.

| Empirical formula                                                | CsLiGa <sub>6</sub> S <sub>10</sub> |
|------------------------------------------------------------------|-------------------------------------|
| CCDC                                                             | 2154078                             |
| Fw                                                               | 1757.54                             |
| Temperature (K)                                                  | 293(2)                              |
| Space group                                                      | Cc                                  |
| <i>a</i> (Å)                                                     | 16.763(1)                           |
| <i>b</i> (Å)                                                     | 6.436(1)                            |
| <i>c</i> (Å)                                                     | 16.192(1)                           |
| $\beta$ (°)                                                      | 111.03(1)                           |
| <i>V</i> (Å <sup>3</sup> )                                       | 1630.5(1)                           |
| <i>Z</i>                                                         | 2                                   |
| <i>D</i> <sub>calcd</sub> (g cm <sup>-3</sup> )                  | 3.580                               |
| $\mu$ (mm <sup>-1</sup> )                                        | 13.224                              |
| GOF on <i>F</i> <sup>2</sup>                                     | 1.031                               |
| <i>R</i> <sub>1</sub> <sup>a</sup> ( <i>I</i> > 2σ( <i>I</i> ))  | 0.0197                              |
| <i>wR</i> <sub>2</sub> <sup>b</sup> ( <i>I</i> > 2σ( <i>I</i> )) | 0.0402                              |
| <i>R</i> <sub>1</sub> <sup>a</sup> (all data)                    | 0.0200                              |
| <i>wR</i> <sub>2</sub> <sup>b</sup> (all data)                   | 0.0403                              |
| <i>Flack</i>                                                     | -0.001(7)                           |
| $\Delta\rho_{\max}/\Delta\rho_{\min}$ , (e Å <sup>-3</sup> )     | 0.766/-1.018                        |

<sup>a</sup>*R* =  $\Sigma ||F_o| - |F_c|| / \Sigma |F_o|$ , <sup>b</sup>*wR* =  $(\Sigma(w(F_o^2 - F_c^2)^2) / \Sigma(w(F_o^2)^2))^{1/2}$ .

**Table S2.** Atomic coordinates and equivalent isotropic displacement parameters (Å<sup>-2</sup>) of CsLiGa<sub>6</sub>S<sub>10</sub>.

| atoms | x           | y           | z           | U(eq)       |
|-------|-------------|-------------|-------------|-------------|
| Cs1   | 0.68507(3)  | 0.31061(5)  | 0.64054(3)  | 0.01925(11) |
| Li1   | 0.4181(6)   | 0.8321(12)  | 0.8142(7)   | 0.007(3)    |
| Ga1   | 0.86362(5)  | 0.83381(9)  | 0.89388(6)  | 0.0090(2)   |
| Ga2   | 0.63344(4)  | 0.68567(10) | 0.84628(5)  | 0.0096(2)   |
| Ga3   | 0.49755(5)  | 0.82308(11) | 0.63012(5)  | 0.0092(2)   |
| Ga4   | 0.81262(5)  | 0.68154(10) | 0.48574(5)  | 0.0093(2)   |
| Ga5   | 0.94721(6)  | 0.83936(10) | 0.71687(5)  | 0.00959(19) |
| Ga6   | 0.59600(5)  | 0.83322(9)  | 0.44352(5)  | 0.00955(19) |
| S1    | 0.55671(9)  | 0.8299(2)   | 0.92012(11) | 0.0107(4)   |
| S2    | 0.95240(10) | 0.66592(17) | 0.59275(10) | 0.0084(3)   |
| S3    | 1.00000(10) | 0.8291(2)   | 1.00000(9)  | 0.0091(3)   |
| S4    | 0.40060(10) | 0.6631(2)   | 0.67388(11) | 0.0111(3)   |
| S5    | 0.72420(12) | 0.7948(2)   | 0.55057(12) | 0.0127(4)   |
| S6    | 0.77322(10) | 0.6646(2)   | 0.95028(11) | 0.0090(3)   |
| S7    | 0.63471(12) | 0.8186(2)   | 0.71976(13) | 0.0131(4)   |
| S8    | 0.81480(10) | 0.8389(2)   | 0.36276(10) | 0.0101(3)   |
| S9    | 0.58842(11) | 0.3391(2)   | 0.81538(11) | 0.0094(3)   |
| S10   | 0.85949(9)  | 0.6694(2)   | 0.77003(10) | 0.0106(4)   |

**Table S3.** The selected bonds and distances of CsLiGa<sub>6</sub>S<sub>10</sub>.

| bond    | distances  | bond    | distances  | bond    | distances  |
|---------|------------|---------|------------|---------|------------|
| Cs1-S1  | 3.5599(16) | Ga1-S10 | 2.2462(18) | Ga4-S5  | 2.224(2)   |
| Cs1-S4  | 3.5840(16) | Ga1-S8  | 2.2507(15) | Ga4-S8  | 2.2457(18) |
| Cs1-S5  | 3.5984(16) | Ga1-S6  | 2.3041(18) | Ga4-S6  | 2.3362(16) |
| Cs1-S8  | 3.6035(16) | Ga1-S3  | 2.315(2)   | Ga4-S2  | 2.3640(18) |
| Cs1-S7  | 3.6278(15) | Ga2-S7  | 2.227(2)   | Ga5-S10 | 2.2378(15) |
| Cs1-S7  | 3.7184(15) | Ga2-S1  | 2.2469(16) | Ga5-S4  | 2.2465(15) |
| Cs1-S10 | 3.7253(15) | Ga2-S6  | 2.3478(19) | Ga5-S2  | 2.3277(16) |
| Cs1-S9  | 3.7369(15) | Ga2-S9  | 2.3504(16) | Ga5-S9  | 2.332(2)   |
| Cs1-S5  | 3.7763(15) | Ga3-S7  | 2.236(2)   | Ga6-S5  | 2.2384(19) |
| Cs1-S2  | 3.8094(17) | Ga3-S4  | 2.2427(16) | Ga6-S1  | 2.2584(16) |
| Cs1-S6  | 3.8687(16) | Ga3-S3  | 2.3370(15) | Ga6-S9  | 2.3156(18) |
| Cs1-S3  | 3.8875(15) | Ga3-S2  | 2.3407(14) | Ga6-S3  | 2.3608(17) |
|         |            | Li1-S1  | 2.342(10)  | Li1-S8  | 2.409(10)  |
|         |            | Li1-S10 | 2.384(8)   | Li1-S4  | 2.440(11)  |

**Table S4.** Powder LIDTs of CsLiGa<sub>6</sub>S<sub>10</sub> and AgGaS<sub>2</sub>.

| compounds                           | damage energy (mJ) | spot area (cm <sup>2</sup> ) | $\tau_p$ (ns) | damage threshold [MW·cm <sup>-2</sup> ] |
|-------------------------------------|--------------------|------------------------------|---------------|-----------------------------------------|
| CsLiGa <sub>6</sub> S <sub>10</sub> | 15.3               | 0.03                         | 10            | 51.0                                    |
| AgGaS <sub>2</sub>                  | 3.4                | 0.03                         | 10            | 11.3                                    |
